# Supplementary material
Source: PubMed Central journal article supplement (PMC4121844)
Supplement: 1404361111_pnas.201404361SI.pdf [file 1404361111_pnas.201404361SI.pdf]

# Supporting Information

Hou et al. 10.1073/pnas.1404361111

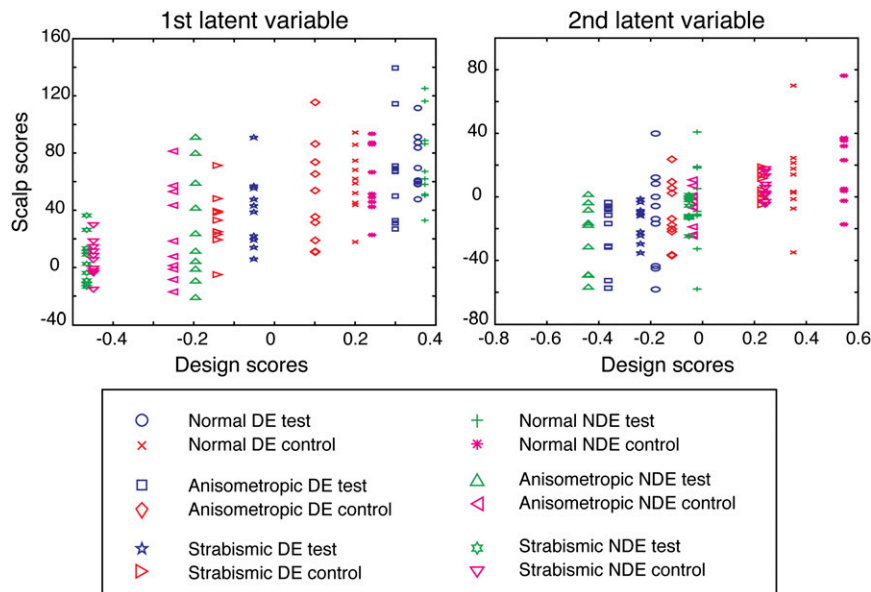

**Fig. S1.** Individual subject scores for latent variable (LV)1 (*Left*) and LV2 (*Right*) from the partial least squares (PLS) analysis in Fig. 3*B*. The color symbols code each eye and each condition. DE, dominant eye; NDE, nondominant eye. The design scores along the x axis reflect the mean values of the weights shown in Fig. 3*B* (*Right*) corresponding to the differences between the test and control conditions and between the subject categories. The y axis indicates the scores for individual subjects. The between-subject variability is comparable across eyes and subject groups for both LVs.

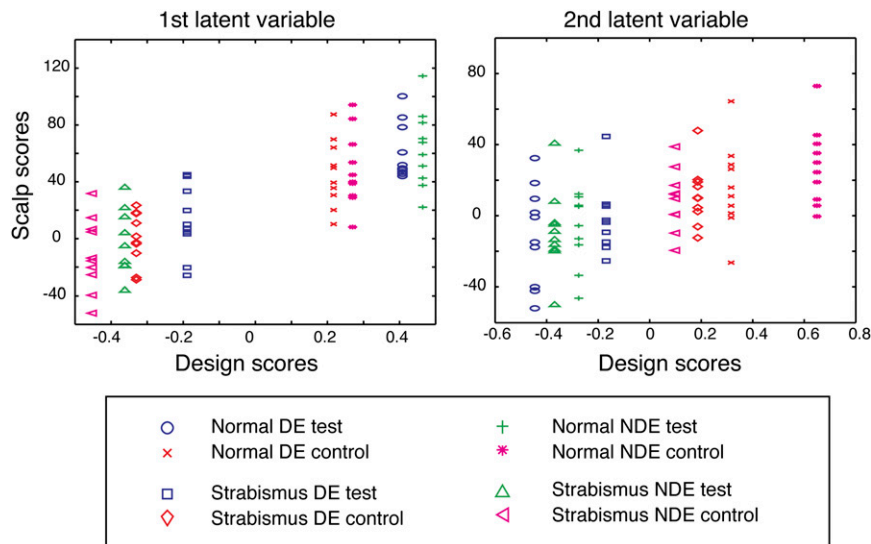

**Fig. S2.** Individual subject scores for LV1 (*Left*) and LV2 (*Right*) from the PLS analysis in Fig. 5*B*. The color symbols code each eye and each condition. The design scores along the x axis reflect the mean values of the weights shown in Fig. 5*B* (*Right*) corresponding to the differences between the test and control conditions and between the subject categories. The y axis indicates the scores for individual subjects. The between-subject variability is comparable across eyes and subject groups for both LVs.
